# Supplementary material
Source: PubMed Central journal article supplement (PMC7391159)
Supplement: advancesADV2020002062-suppl1.pdf [file advancesADV2020002062-suppl1.pdf]

# Priapism Survey

Record ID \_\_\_\_\_

## The Purpose of the Study of Sexual Functioning Experiences

**Thank you for your participation in this study. We appreciate your willingness to participate in this important research. This questionnaire is part of a study to assess the experiences of men with sickle cell disease about sexual functioning.**

**This questionnaire is administered with secure standards to ensure your privacy. Only authorized study personnel will have access to your responses. All answers are completely confidential.**

**This survey makes reference to priapism which is defined as prolonged, unwanted erections (erections that do not go down) and may occur with or without sexual stimulation.**

Date \_\_\_\_\_

## Section A: Demographic and Socioeconomic Information

Age \_\_\_\_\_

Marital Status

- Married
- Divorced
- Widowed
- Single
- Undisclosed

What is your level of education?

- Primary
- Secondary
- Tertiary
- none

What is your job?

- Senior civil servant (level 7-10)
- Senior civil servant (level 11-16)
- Junior civil servant (< level 7)
- Trader/Private business
- Work in a private sector
- Unemployed
- Others

If others... Please specify \_\_\_\_\_

(Job)

How much do you earn per month?

- < 18, 000 (< \$50)  
 000 to 36,000 (\$50- \$100)  
 360 - 72000 (\$101-\$200)  
 others  
 (Naira (N))

If others... Please specify.

\_\_\_\_\_  
(Monthly income)

Do you have dependents?

- Yes  No

If yes, how many?

\_\_\_\_\_  
(Number of dependents)

Do you take alcohol?

- Yes  No

Do you smoke?

- Yes  No

Answer the next two questions if you have answered yes to the above question

For how many years?

\_\_\_\_\_  
(years of smoking cigarettes)

How many cigarettes per day?

\_\_\_\_\_  
(Number of cigarettes intake per day)

### Section B: Sickle Cell Activity

What type of Sickle Cell Disease do you have?

- HbSS  
 HbSC  
 HbSBThal  
 Not sure

Have you ever had a pain crisis (vaso-occlusive crisis)?

- Yes  No

**Pain crisis sub session: Please provide answers to this session if you have answered yes to the above question.**

When was your last pain crisis (vaso-occlusive crisis)?

- 1 week ago  
 2 weeks ago  
 4 weeks ago  
 others

If others, please specify:

\_\_\_\_\_

Over the last year, how often have you had pain or a vaso-occlusive crisis?

- At least once a week  
 2-3 times per month  
 Once every 1-3 months  
 Once every 4-6 months  
 Once every 7-11 months  
 Once a year or less frequent

How many times were you admitted to the hospital in the last year for a pain crisis?

- None  
 1-2 times  
 3-5 times  
 5-9 times  
 10 times

Please give the last admission date for a pain crisis?

\_\_\_\_\_ (d-m-y)

### End of sub session for additional details on pain crisis

Have you ever been hospitalized for acute chest syndrome or pneumonia?

- yes    no    unsure

Do you have a history of avascular necrosis or bone problems other than a typical crisis?

- Yes    No

Have you had any type of joint surgery or replacement?

- Yes    No

If yes, what joint?

- Hip  
 Shoulder  
 Knee  
 Other

If other..... please, state:

\_\_\_\_\_ (State the joint replaced)

### Section C: Priapism Assessment

Have you ever experienced priapism?

- Yes    No

When did you first experience priapism?

- childhood (less than 12 years old)  
 teenager (13-17 years old)  
 young adult (18-25 years old)  
 adult (more than 25 years old)

In what situations do you experience priapism?

- sexual arousal  
 sexual intercourse  
 sleep  
 other

If you checked other to the previous question, please enter the situation.

\_\_\_\_\_ (Situation you experienced priapism)

---

How often do you experience priapism?

- daily  
 every other day  
 once a week  
 once a month  
 other
- 

If you checked other, please specify how often.

\_\_\_\_\_

---

How long does a typical priapism episode last?

- less than half an hour  
 1 hour  
 2 hours  
 3-4 hours  
 5-6 hours  
 More than 6 hours
- 

Does your typical priapism episode last for at-least 3 days?

- Yes  No
- 

Have these priapism episodes caused pain?

- Yes  No
- 

Have you noticed a deformity or scarring of the penis?

- Yes  No
- 

What methods if any, have you used for these priapism episodes?

- sexual activity  
 shower or bath  
 cold or hot packs  
 exercise  
 other
- 

If you entered other , please specify the method:

\_\_\_\_\_

---

What methods if any, have helped?

- sexual activity  
 shower or bath  
 cold or hot packs  
 exercise  
 other
- 

If you entered other, please specify the method that was helpful.

\_\_\_\_\_

---

Have you ever received medical treatment for these priapism episodes?

- Yes  No
- 

What medical treatments have been given to you, if any?

- sedation  
 pain medication  
 anesthesia  
 oxygen  
 blood transfusion  
 hormone shots or pills  
 penile injections  
 penile surgery  
 other

---

If you selected other for the previous question, please specify what treatment.

---

---

Have any of these treatments helped? (Please describe)

---

---

Is your priapism condition better or worse since it began?

- better  
 worse  
 about the same

---

Have your erections for "wanted" sexual situations worsened over time?

- Yes    No    Not applicable

---

What treatments, if any, have you used to improve erections for "wanted" sexual situation?

- herbal supplements  
 yohimbine  
 Viagra or Levitra or Cialis  
 penile constrictive ring  
 penile injections  
 other

---

If you entered other to the previous question, please specify the treatment.

---

---

Has your priapism condition affected your partner relationship?

- Yes    No    Not applicable

---

If you selected yes to the previous question, please describe how the condition has affected your relationship.

---

---

Has your priapism condition affected your feelings about yourself (self-image)?

- Yes    No

---

If you selected yes, mark all that are applicable.

- exhausted  
 confused  
 angry  
 frustrated  
 sad  
 embarrassed  
 frightened  
 depressed  
 anxious
